# Supplementary material
Source: MDPI journal article supplement (https://www.mdpi.com/2071-1050/15/9/7055)
Supplement: s1 [file s1]

Archive with 2 entries (2 files):
- PRISMA 2020 checklist.pdf
- PRISMA 2020 flow diagram.pdf
